# Supplementary material for: Apple (Malus domestica Borkh.) Cultivar ‘Majda’, a Naturally Non-Browning Cultivar: An Assessment of Its Qualities
Source: MDPI journal article supplement (doi:10.3390/plants10071402), 2021-07-09
Supplement: s1 [file s1]

**Table S1.** The contrast analysis for total sugars with estimated differences between averages and corresponding 95 % confidence intervals (lwr, lower boundary; upr, upper boundary), for time (harvest, storage), location (L1 and L2) and cultivar (GD, 'Golden Delicious'; MA, 'Majda').

| Linear hypotheses       | Differences of |       |      |
|-------------------------|----------------|-------|------|
|                         | means          | lwr   | upr  |
| storage GD: L1 / L2     | -10.9          | -21.7 | -0.1 |
| harvest L1:GD / MA      | 9.1            | -1.7  | 19.9 |
| harvest L2:GD / MA      | 13.6           | 2.8   | 24.4 |
| L1 MA:harvest / storage | -11.4          | -22.2 | -0.5 |
| L2 MA:harvest / storage | -15.3          | -26.1 | -4.4 |

**Table S2.** The contrast analysis for total organic acids with estimated differences between averages and corresponding 95 % confidence intervals (lwr, lower boundary; upr, upper boundary), for time (harvest, storage), location (L1 and L2) and cultivar (GD, 'Golden Delicious'; MA, 'Majda').

| Linear hypotheses       | Differences of |      |      |
|-------------------------|----------------|------|------|
|                         | means          | lwr  | upr  |
| storage MA:L1 / L2      | 2.4            | 0.8  | 4.0  |
| harvest L1: GD / MA     | -2.8           | -4.4 | -1.2 |
| harvest L2: GD / MA     | -2.9           | -4.5 | -1.3 |
| storage L1: GD / MA     | -4.9           | -6.6 | -3.3 |
| L1 GD:harvest / storage | 2.8            | 1.2  | 4.4  |
| L2 GD:harvest / storage | 2.5            | 0.9  | 4.1  |
| L2 MA:harvest / storage | 4.2            | 2.6  | 5.9  |

**Table S3.** The contrast analysis for pH with estimated differences between averages and corresponding 95 % confidence intervals (lwr, lower boundary; upr, upper boundary), for time (harvest, storage), location (L1 and L2) and cultivar (GD, 'Golden Delicious'; MA, 'Majda').

| Linear hypotheses       | Differences of |      |      |
|-------------------------|----------------|------|------|
|                         | means          | lwr  | upr  |
| harvest L1: GD / MA     | 0.4            | 0.3  | 0.5  |
| harvest L2: GD / MA     | 0.3            | 0.2  | 0.4  |
| storage L1: GD / MA     | 0.5            | 0.4  | 0.6  |
| storage L2: GD / MA     | 0.4            | 0.3  | 0.5  |
| L1 GD:harvest / storage | -0.2           | -0.2 | 0.0  |
| L2 GD:harvest / storage | -0.2           | -0.3 | -0.1 |

**Table S4.** The contrast analysis for change in color ( $\Delta E \Delta t^{-1}$ ) with estimated ratios of averages and corresponding 95 % confidence intervals (lwr, lower boundary; upr, upper boundary), for time (harvest, storage), location (L1 and L2) and cultivar (GD, 'Golden Delicious'; MA, 'Majda').

| Linear hypotheses         | Ratio of means | lwr  | upr  |
|---------------------------|----------------|------|------|
| harvest GD:halves/pomace  | 0.24           | 0.14 | 0.43 |
| harvest MA:halves/pomace  | 0.23           | 0.13 | 0.41 |
| storage GD:halves/pomace  | 0.49           | 0.28 | 0.86 |
| harvest, halves: GD/MA    | 3.57           | 2.02 | 6.33 |
| harvest, pomace: GD/MA    | 3.41           | 1.93 | 6.04 |
| storage, halves: GD/MA    | 2.15           | 1.22 | 3.81 |
| storage, pomace: GD/MA    | 2.77           | 1.57 | 4.91 |
| pomace GD:harvest/storage | 1.83           | 1.03 | 3.23 |
| halves MA:harvest/storage | 0.54           | 0.31 | 0.96 |

**Table S5.** The contrast analysis for vitamin C, methionine, cysteine and glutathione (GSH and GSSG) with estimated ratios of averages and corresponding 95 % confidence intervals (lwr, lower boundary; upr, upper boundary), for time (harvest, storage), location (L1 and L2) and cultivar (GD, 'Golden Delicious'; MA, 'Majda').

| Linear hypotheses        | Ratio of means | lwr  | upr   |
|--------------------------|----------------|------|-------|
| <b><i>Vitamin C</i></b>  |                |      |       |
| harvest GD:L1/L2         | 0.61           | 0.42 | 0.9   |
| storage L1: GD/MA        | 0.24           | 0.35 | 0.35  |
| storage L2: GD/MA        | 0.39           | 0.57 | 0.57  |
| L1 GD:harvest/storage    | 2.71           | 3.98 | 3.98  |
| L2 GD:harvest/storage    | 3.33           | 4.89 | 4.89  |
| <b><i>Methionine</i></b> |                |      |       |
| storage GD:L1/L2         | 3.18           | 1.61 | 6.27  |
| storage MA:L1/L3         | 2.39           | 1.21 | 4.71  |
| storage L1: GD/MA        | 0.18           | 0.09 | 0.36  |
| storage L2: GD/MA        | 0.14           | 0.07 | 0.27  |
| L1 GD:harvest/storage    | 5.86           | 2.98 | 11.55 |
| L2 GD:harvest/storage    | 23.05          | 11.7 | 45.41 |
| <b><i>Cysteine</i></b>   |                |      |       |
| harvest L2: GD/MA        | 1.25           | 1.03 | 1.53  |
| L1 GD:harvest/storage    | 1.37           | 1.13 | 1.68  |
| L2 GD:harvest/storage    | 1.51           | 1.24 | 1.84  |
| <b><i>GSH</i></b>        |                |      |       |
| harvest GD:L1/L2         | 0.72           | 0.55 | 0.94  |
| harvest L1: GD/MA        | 0.5            | 0.38 | 0.66  |
| harvest L1: GD/MA        | 0.6            | 0.46 | 0.78  |
| storage L1: GD/MA        | 0.52           | 0.4  | 0.68  |
| storage L2: GD/MA        | 0.42           | 0.32 | 0.54  |
| L1 GD:harvest/storage    | 0.7            | 0.54 | 0.92  |
| L1 MA:harvest/storage    | 0.73           | 0.56 | 0.95  |
| <b><i>GSSG</i></b>       |                |      |       |
| GD/MA                    | 0.69           | 0.56 | 0.85  |

**Table S6.** Individual phenols (mean  $\pm$  SE) in flesh (mg kg<sup>-1</sup> FW), peels (mg kg<sup>-1</sup> FW) and leaves (mg kg<sup>-1</sup> DW). Hydroxycinnamic acids: cryptochlorogenic acid, 4-CQA; chlorogenic acid, 3-CQA; neochlorogenic acid, 5-CQA and p-coumaric acid, p\_coum\_ac and; Dihydrochalcones: phloridzin, Phl; phloretin 2'-O- xylosyl-glucoside, Phl\_xy\_phl; 3-hydroxyphloridzin, 3\_Hy\_phl and 3-hydroxyphloretin, 3\_Hyd\_phl; flavonols: quercetin-3-rhamnoside, Q-Rha; quercetin-3-rutinoside, Q-Rut and quercetin-3-glycoside + quercetin-3-galactoside, Q-Glc\_Gal; flavan-3-ols: catechin, Cat; epicatechin, Epicat; procyanidin B1, P\_B1; procyanidin B2 + B4, P\_B2\_B4.

| Hydroxycinnamic acids |          |         |       |     |       |     |       |      |           | Dihydrochalcones |      |     |            |     |          |     |           |      |  |
|-----------------------|----------|---------|-------|-----|-------|-----|-------|------|-----------|------------------|------|-----|------------|-----|----------|-----|-----------|------|--|
| Flesh                 |          |         | 4-CQA |     | 3-CQA |     | 5-CQA |      | p_coum ac |                  | Phl  |     | Phl_Xy_Glc |     | 3_Hy_phl |     | 3_Hyd_phl |      |  |
| Cultivar              | Location | Time    | mean  | se  | mean  | se  | mean  | se   | mean      | se               | mean | se  | mean       | se  | mean     | se  | mean      | se   |  |
| 'Golden Delicious'    | L1       | harvest | 0.6   | 0.0 | 35.2  | 5.4 | 0.1   | 0.0  | 0.6       | 0.1              | 1.4  | 0.1 | 0.9        | 0.2 | 0.5      | 0.5 | 0.0       | 0.0  |  |
|                       |          | storage | 0.7   | 0.1 | 68.7  | 5.7 | 0.1   | 0.0  | 1.0       | 0.0              | 4.0  | 1.1 | 3.8        | 0.6 | 0.9      | 0.6 | 0.0       | 0.0  |  |
|                       | L2       | harvest | 0.6   | 0.0 | 56.2  | 4.6 | 0.1   | 0.0  | 1.0       | 0.1              | 1.2  | 0.2 | 1.0        | 0.3 | 0.4      | 0.4 | 0.0       | 0.0  |  |
|                       |          | storage | 0.7   | 0.1 | 92.1  | 9.3 | 0.1   | 0.0  | 1.6       | 0.1              | 2.7  | 0.2 | 3.4        | 0.4 | 1.0      | 0.6 | 0.0       | 0.0  |  |
| 'Majda'               | L1       | harvest | 0.0   | 0.0 | 4.9   | 0.9 | 0.0   | 0.0  | 0.0       | 0.0              | 1.8  | 0.1 | 0.8        | 0.2 | 0.0      | 0.0 | 0.0       | 0.0  |  |
|                       |          | storage | 0.2   | 0.1 | 5.1   | 0.2 | 0.03  | 0.03 | LOQ       |                  | 1.6  | 0.2 | 1.4        | 0.2 | 0.0      | 0.0 | 0.03      | 0.03 |  |
|                       | L2       | harvest | 0.0   | 0.0 | 4.9   | 0.7 | 0.0   | 0.0  | 0.0       | 0.0              | 1.8  | 0.3 | 0.5        | 0.1 | 0.0      | 0.0 | 0.02      | 0.02 |  |
|                       |          | storage | 0.0   | 0.0 | 8.2   | 1.6 | 0.05  | 0.04 | LOQ       |                  | 2.7  | 0.7 | 2.3        | 0.6 | 0.0      | 0.0 | 0.05      | 0.03 |  |

| Peel               |          |  | 4-CQA2 |     | 3-CQA |     | 5-CQA |     | p_coum ac |     | Phl  |     | Phl_Xy_Glc |     | 3_Hy_phl |     | 3_Hyd_phl |     |
|--------------------|----------|--|--------|-----|-------|-----|-------|-----|-----------|-----|------|-----|------------|-----|----------|-----|-----------|-----|
| Cultivar           | Location |  | mean   | se  | mean  | se  | mean  | se  | mean      | se  | mean | se  | mean       | se  | mean     | se  | mean      | se  |
| 'Golden Delicious' | L1       |  | 0.5    | 0.2 | 25.0  | 2.5 | 0.1   | 0.0 | 3.0       | 0.2 | 19.3 | 1.5 | 12.2       | 0.8 | 0.0      | 0.0 | 1.2       | 0.1 |
|                    | L2       |  | 0.6    | 0.0 | 41.2  | 2.9 | 0.1   | 0.0 | 5.5       | 0.2 | 17.6 | 2.3 | 13.2       | 0.8 | 0.0      | 0.0 | 0.3       | 0.1 |
| 'Majda'            | L1       |  | 0.0    | 0.0 | 1.4   | 0.1 | 0.0   | 0.0 | 1.1       | 0.2 | 29.3 | 2.9 | 5.9        | 0.5 | 0.0      | 0.0 | 0.6       | 0.3 |
|                    | L2       |  | 0.0    | 0.0 | 1.3   | 0.1 | 0.0   | 0.0 | 1.9       | 0.2 | 25.6 | 2.1 | 6.5        | 0.8 | 0.0      | 0.0 | 1.1       | 0.5 |

| Leaves             |          |  | Arb  |     | 4-CQA2 |     | 3-CQA |       | 5-CQA |     | Phl    |       | Phl_Xy_Glc |      | 3_Hy_phl |      | 3_Hyd_phl |       |
|--------------------|----------|--|------|-----|--------|-----|-------|-------|-------|-----|--------|-------|------------|------|----------|------|-----------|-------|
| Cultivar           | Location |  | mean | se  | mean   | se  | mean  | se    | mean  | se  | mean   | se    | mean       | se   | mean     | se   | mean      | se    |
| 'Golden Delicious' | L1       |  | 12.4 | 0.7 | 1.7    | 0.2 | 215.1 | 21.8  | 7.2   | 0.2 | 5229.5 | 45.1  | 29.3       | 4.2  | 508.4    | 30.6 | 202.6     | 24.2  |
|                    | L2       |  | 14.7 | 0.8 | 1.8    | 0.3 | 302.8 | 24.8  | 8.4   | 0.3 | 5407.3 | 51.3  | 15.2       | 1.1  | 627.1    | 75.0 | 331.5     | 23.3  |
| 'Majda'            | L1       |  | 9.5  | 1.5 | 2.1    | 0.3 | 347.5 | 54.1  | 3.3   | 0.5 | 5148.9 | 200.7 | 407.7      | 39.0 | 314.4    | 65.3 | 707.5     | 246.4 |
|                    | L2       |  | 13.4 | 0.6 | 2.6    | 0.5 | 451.5 | 102.7 | 4.7   | 0.6 | 5779.7 | 152.5 | 377.2      | 15.4 | 552.0    | 57.5 | 201.0     | 11.1  |

|                    |          |         | Flavonols |     |           |     |       |     | Flavan-3-ols |     |        |     |      |     |         |     |
|--------------------|----------|---------|-----------|-----|-----------|-----|-------|-----|--------------|-----|--------|-----|------|-----|---------|-----|
| <b>Flesh</b>       |          |         | Q-Rha     |     | Q-Glc_Gal |     | Q-rut |     | Cat          |     | Epicat |     | P_B1 |     | P_B2_B4 |     |
| Cultivar           | Location | Time    | mean      | se  | mean      | se  | mean  | se  | mean         | se  | mean   | se  | mean | se  | mean    | se  |
| 'Golden Delicious' | L1       | harvest | 0.1       | 0.1 | 0.0       | 0.0 | 0.0   | 0.0 | 1.4          | 0.4 | 3.9    | 1.0 | 0.9  | 0.1 | 5.0     | 1.5 |
|                    |          | storage | 0.2       | 0.0 | 0.0       | 0.0 | 0.0   | 0.0 | 3.6          | 0.5 | 5.3    | 0.6 | 1.7  | 0.2 | 14.1    | 1.7 |
|                    | L2       | harvest | 0.3       | 0.1 | 0.0       | 0.0 | 0.0   | 0.0 | 3.0          | 0.3 | 5.7    | 0.4 | 1.6  | 0.3 | 8.5     | 2.2 |
|                    |          | storage | 0.4       | 0.1 | 0.0       | 0.0 | 0.0   | 0.0 | 5.1          | 0.5 | 10.3   | 0.6 | 2.3  | 0.6 | 29.0    | 1.4 |
| 'Majda'            | L1       | harvest | 0.3       | 0.1 | 0.2       | 0.0 | 0.0   | 0.0 | 0.0          | 0.0 | 0.2    | 0.1 | 0.0  | 0.0 | 0.0     | 0.0 |
|                    |          | storage | 0.3       | 0.0 | 0.2       | 0.0 | 0.0   | 0.0 | 0.2          | 0.1 | 0.1    | 0.0 | 0.1  | 0.1 | 0.4     | 0.2 |
|                    | L2       | harvest | 0.3       | 0.1 | 0.1       | 0.0 | 0.0   | 0.0 | 0.0          | 0.0 | 0.2    | 0.1 | 0.0  | 0.0 | 0.2     | 0.2 |
|                    |          | storage | 0.3       | 0.0 | 0.2       | 0.0 | 0.0   | 0.0 | LOQ          |     | 0.0    | 0.0 | 0.0  | 0.0 | 0.5     | 0.3 |

| <b>Peel</b>        |          |  | Q-Rha |     | Q-Glc_Gal |     | Q-rut |     | Cat  |     | Epicat |     | P_B1 |     | P_B2_B4 |     |
|--------------------|----------|--|-------|-----|-----------|-----|-------|-----|------|-----|--------|-----|------|-----|---------|-----|
| Cultivar           | Location |  | mean  | se  | mean      | se  | mean  | se  | mean | se  | mean   | se  | mean | se  | mean    | se  |
| 'Golden delicious' | L1       |  | 13.9  | 1.2 | 42.7      | 4.3 | 5.1   | 1.0 | 7.8  | 1.3 | 26.8   | 2.0 | 1.7  | 0.6 | 75.1    | 4.0 |
|                    | L2       |  | 14.3  | 2.3 | 34.8      | 6.0 | 2.0   | 0.8 | 15.1 | 0.6 | 47.5   | 1.6 | 6.1  | 0.8 | 137.7   | 7.8 |
| 'Majda'            | L1       |  | 9.3   | 1.1 | 64.7      | 7.2 | 0.0   | 0.0 | 4.4  | 0.6 | 7.7    | 0.8 | 1.2  | 0.5 | 18.6    | 2.9 |
|                    | L2       |  | 7.3   | 1.0 | 38.6      | 5.4 | 0.0   | 0.0 | 4.3  | 0.4 | 14.4   | 0.8 | 1.8  | 0.4 | 25.4    | 3.6 |

| <b>Leaves</b>      |          |  | Q-Rha |      | Q-Glc_Gal |      | Q-rut |      | Cat  |     | Epicat |     | P_B1 |     | P_B2_B4 |     |
|--------------------|----------|--|-------|------|-----------|------|-------|------|------|-----|--------|-----|------|-----|---------|-----|
| Cultivar           | Location |  | mean  | se   | mean      | se   | mean  | se   | mean | se  | mean   | se  | mean | se  | mean    | se  |
| 'Golden delicious' | L1       |  | 396.4 | 8.4  | 711.2     | 22.2 | 224.4 | 22.0 | 6.1  | 0.5 | 99.9   | 5.9 | 4.6  | 0.8 | 74.3    | 7.3 |
|                    | L2       |  | 341.3 | 6.6  | 694.9     | 18.8 | 406.6 | 31.2 | 9.4  | 1.2 | 148.9  | 8.3 | 12.3 | 1.6 | 153.4   | 9.9 |
| 'Majda'            | L1       |  | 285.4 | 11.1 | 657.7     | 51.8 | 7.0   | 2.2  | 3.3  | 0.3 | 33.1   | 2.2 | 1.9  | 0.6 | 32.2    | 2.9 |
|                    | L2       |  | 272.1 | 10.7 | 752.5     | 11.1 | 2.9   | 1.0  | 4.9  | 0.5 | 49.3   | 3.6 | 2.2  | 0.7 | 45.2    | 5.3 |

LOQ, limit of quantitation

**Table S7.** The contrast analysis for phenolic groups dihydrochalcones and flavonols in apple flesh with estimated estimated ratios of averages and corresponding 95 % confidence intervals (lwr, lower boundary; upr, upper boundary), for time (harvest, storage), location (L1 and L2) and cultivar (GD, 'Golden Delicious'; MA, 'Majda').

| Linear hypotheses       | Ratio of means | lwr  | upr  |
|-------------------------|----------------|------|------|
| <i>Dihydrochalcones</i> |                |      |      |
| harvest.GD / storage.GD | 0.35           | 0.23 | 0.52 |
| harvest.MA / storage.GD | 0.32           | 0.21 | 0.48 |
| harvest.MA / storage.MA | 0.66           | 0.43 | 0.99 |
| storage.GD / storage.MA | 2.09           | 1.38 | 3.15 |
| <i>Flavonols</i>        |                |      |      |
| GD.L1 - GD.L2           | 0.41           | 0.22 | 0.76 |
| GD.L1 - MA.L1           | 0.32           | 0.17 | 0.59 |
| GD.L1 - MA.L2           | 0.31           | 0.17 | 0.57 |

**Table S8.** HSD.test for phenolic groups hydroxycinnamic acids, dihydrochalcones, flavonols and flavan-3-ols in apple flesh, peel and leaves with estimated ratios of averages and corresponding 95 % confidence intervals (lwr, lower boundary; upr, upper boundary), for time (harvest, storage), location (L1 and L2) and cultivar (GD, 'Golden Delicious'; MA, 'Majda').

| <i>Flesh - HSD.test</i>      | Ratio of<br>means | lwr   | upr     |
|------------------------------|-------------------|-------|---------|
| <i>Hydroxycinnamic acids</i> |                   |       |         |
| Harvest / storage            | 0.64              | 0.53  | 0.77    |
| GD / MA                      | 10.98             | 9.06  | 13.32   |
| L1 / L2                      | 0.75              | 0.62  | 0.91    |
| <i>Flavan-3-ols</i>          |                   |       |         |
| GD / MA                      | 287.14            | 55.99 | 1472.66 |
| <i>Peel - HSD.test</i>       |                   |       |         |
| <i>Hydroxycinnamic acids</i> |                   |       |         |
| GD / MA                      | 12.93             | 10.77 | 15.51   |
| L1 / L2                      | 0.67              | 0.56  | 0.81    |
| <i>Flavonols</i>             |                   |       |         |
| L1 / L2                      | 1.43              | 1.05  | 1.95    |
| <i>Flavan-3-ols</i>          |                   |       |         |
| GD / MA                      | 4.01              | 3.38  | 4.77    |
| L1 / L2                      | 0.61              | 0.51  | 0.72    |
| <i>Leaves - HSD.test</i>     |                   |       |         |
| <i>Arbutin</i>               |                   |       |         |
| GD / MA                      | 2.13              | 0.15  | 4.1     |
| L1 / L2                      | -3.16             | -5.13 | -1.18   |
| <i>Hydroxycinnamic acids</i> |                   |       |         |
| GD / MA                      | 0.7               | 0.52  | 0.93    |
| <i>Dihydrochalcones</i>      |                   |       |         |
| GD / MA                      | 0.92              | 0.88  | 0.96    |
| L1 / L2                      | 0.94              | 0.9   | 0.99    |
| <i>Flavonols</i>             |                   |       |         |
| GD / MA                      | 1.41              | 1.29  | 1.53    |
| <i>Flavan-3-ols</i>          |                   |       |         |
| GD / MA                      | 2.89              | 2.53  | 3.31    |
| L1 - L2                      | 0.63              | 0.55  | 0.72    |

**Table S9.** The contrast analysis for PPO and POX with estimated estimated ratios of averages and corresponding 95 % confidence intervals (lwr, lower boundary; upr, upper boundary), for time (harvest, storage), location (L1 and L2) and cultivar (GD, 'Golden Delicious'; MA, 'Majda').

| Linear hypotheses     | Ratio of means | lwr   | upr  |
|-----------------------|----------------|-------|------|
| <b>PPO</b>            |                |       |      |
| storage MA: L1/L2     | 2.00           | 1.18  | 3.30 |
| L2 GD:harvest/storage | 1.81           | 1.08  | 3.04 |
| L2 MA:harvest/storage | 1.69           | 1.01  | 2.84 |
| <b>POX</b>            |                |       |      |
| L2 GD:harvest/storage | -0.52          | -3.51 | 0.03 |

**Table S10.** Meteorological conditions during vegetation period (1. 4. 2019-30. 9. 2021) on locations L1 and L2

| Meteorological variable                                       | L1    | L2    |
|---------------------------------------------------------------|-------|-------|
| Total precepitation (mm)                                      | 731.2 | 752.6 |
| Average daily air temperature (°C)                            | 16.3  | 17.1  |
| Average minimum daily air temperature (°C)                    | 10.8  | 11.5  |
| Average maximum daily air temperature (°C)                    | 21.8  | 23.5  |
| Total solar global radiation in September (W/m <sup>2</sup> ) | 6623  | 7522  |



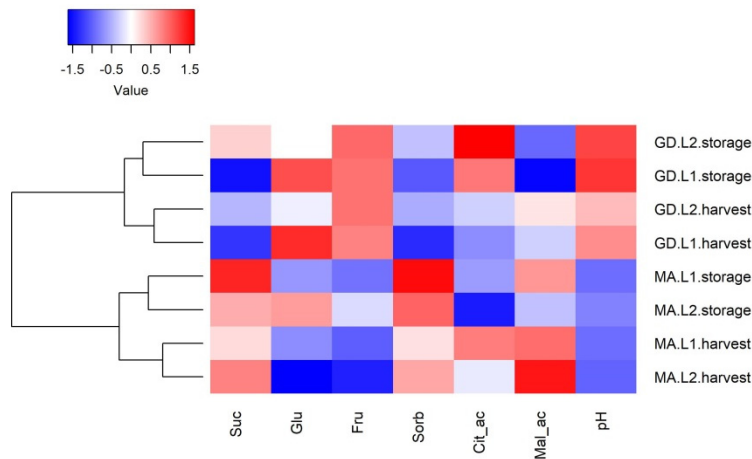

**Figure S1.** Heatmap for standardized variables: individual sugars: sucrose, Suc; glucose, Glu; fructose, Fru; sorbitol, Sorb; organic acids: citric acid, Cit\_ac; malic acid, Mal\_ac and pH for cultivars 'Golden Delicious' (GD) and 'Majda' (MA) at two different locations (L1 and L2) at harvest and following storage, dendrogram based on Ward's clustering squared Euclidian distance.

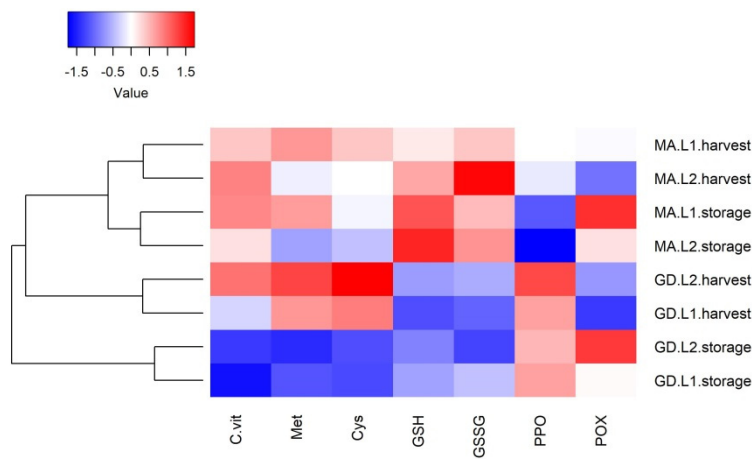

**Figure S2.** Heatmap for standardized variables: vitamin C, C vit; methionine, Met; cysteine, Cys; reduced glutathione, GSH; oxidised glutathione, GSSG; polyphenol oxidase, PPO; peroxidase, POX for cultivars 'Golden Delicious' (GD) and 'Majda' (MA) at two different locations (L1 and L2) at harvest and following storage, dendrogram based on Ward's clustering squared Euclidian distance.

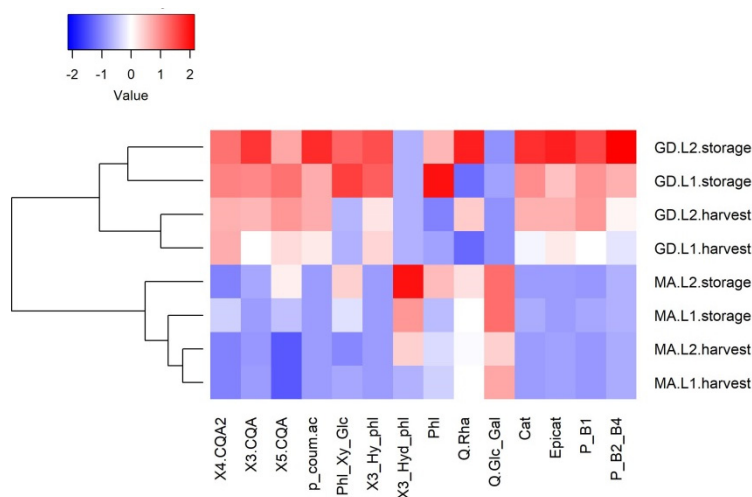

**Figure S3.** Heatmap for standardized variables: Hydroxycinnamic acids: cryptochlorogenic acid, X4-CQA; chlorogenic acid, X3-CQA; neochlorogenic acid, X5-CQA and p-coumaric acid, p\_coum\_ac and; Dihydrochalcones: phloridzin, Phl; phloretin 2'-O- xylosyl-glucoside, Phl\_xy\_phl; 3-hydroxyphloridzin, X3\_Hy\_phl and 3-hydroxyphloretin, X3\_Hyd\_phl; flavonols: quercetin-3-rhamnoside, Q-Rha; quercetin-3-rutinoside, Q-Rut and quercetin-3-glycoside + quercetin-3-galactoside, Q-Glc\_Gal; flavan-3-ols: catechin, Cat; epicatechin, Epicat; procyanidin B1, P\_B1; procyanidin B2 + B4, P\_B2\_B4 for cultivars 'Golden Delicious' (GD) and 'Majda' (MA) at two different locations (L1 and L2) at harvest and following storage, dendrogram based on Ward's clustering squared Euclidian distance.

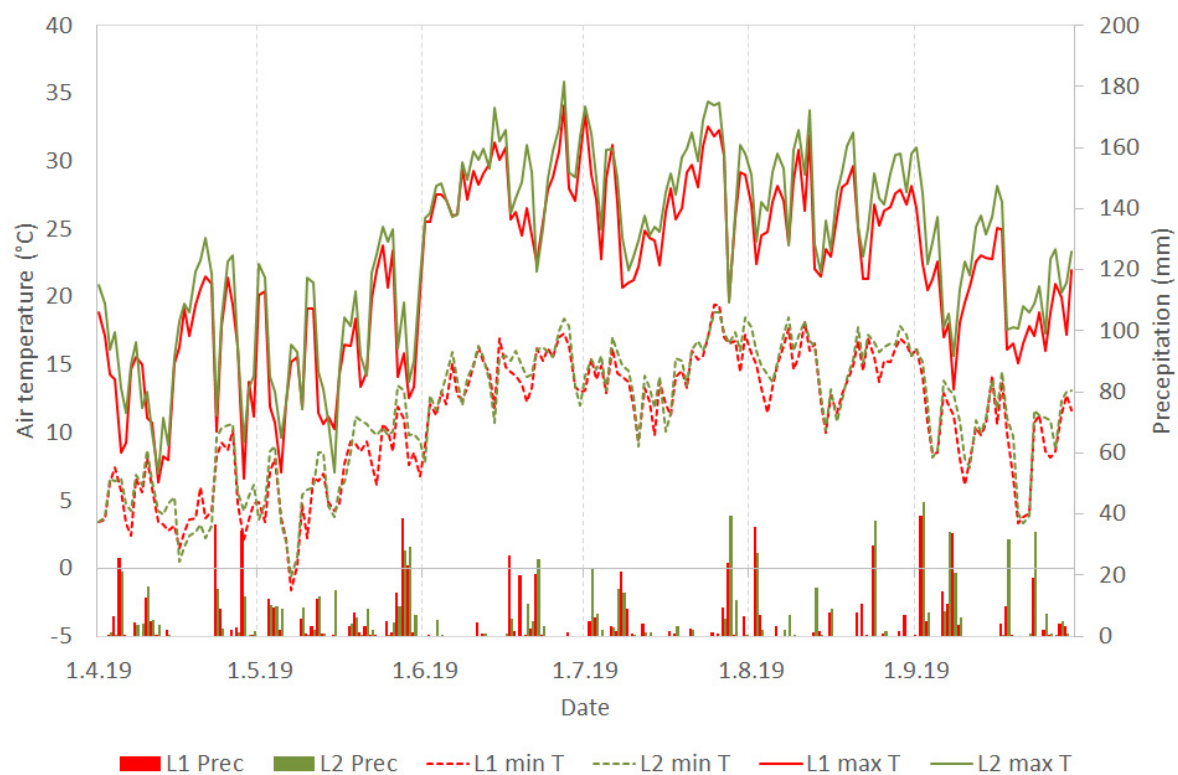

**Figure S4.** Daily precipitations, daily minimum and maximum air temperature for the locations L1 and L2
